# Supplementary material
Source: PubMed Central journal article supplement (PMC6543528)
Supplement: NIHMS1529622-supplement-Supplement1.pdf [file NIHMS1529622-supplement-Supplement1.pdf]

## Supplementary Appendix

This appendix has been provided by the authors to give readers additional information about their work.

Supplement to: Chan DC, Huynh J, Studdert DM. Accuracy of valuations of surgical procedures in the Medicare fee schedule. *N Engl J Med* 2019;380:1546-54. DOI: 10.1056/NEJMsa1807379

## **SUPPLEMENTARY APPENDIX**

### **The accuracy of valuations of surgical procedures in the Medicare Fee Schedule**

David C. Chan, Johnny Huynh, David M. Studdert

#### **TABLE OF CONTENTS**

|    |                                                                                                                      |    |
|----|----------------------------------------------------------------------------------------------------------------------|----|
| 1. | IMPORTANCE OF SERVICE TIME IN DETERMINING WORK RELATIVE VALUE UNITS IN THE RESOURCE-BASED RELATIVE VALUE SCALE ..... | 2  |
| 2. | THE RUC REVIEW PROCESS .....                                                                                         | 3  |
| 3. | MEASUREMENT OF PROCEDURE TIME ACCURACY: CONCEPT AND CALCULATION .....                                                | 5  |
| 4. | ESTIMATION OF REVENUE IMPACTS .....                                                                                  | 7  |
| 5. | PROCEDURE TIME DISCREPANCY AND PROBABILITY OF RUC REVIEW .....                                                       | 11 |
| 6. | SENSITIVITY ANALYSES: TESTING POTENTIAL EFFECTS OF NON-REPRESENTATIVENESS IN NSQIP ON RESULTS.....                   | 12 |
| 7. | ALTERNATIVE MEASURES OF THE ACCURACY OF RUC TIME ESTIMATES .....                                                     | 15 |
| 8. | TIME ESTIMATES.....                                                                                                  | 17 |

# 1. IMPORTANCE OF SERVICE TIME IN DETERMINING WORK RELATIVE VALUE UNITS IN THE RESOURCE-BASED RELATIVE VALUE SCALE

In describing the importance of service time measures to the overall work RVU assigned to procedures in the Introduction section of the manuscript, we report that “the service times used [by the RUC] in valuing the sample of surgical procedures analyzed in this study explained 81% of the variance in the work RVUs assigned to those procedures.” **Figure S1** (below) plots the correlation. A simple bivariate linear regression analysis estimated an intercept term of 3.0 (95% CI, 1.5-4.5), a coefficient of 0.12 (95% CI, 0.11-0.13), and an R-squared value of 0.81.

**Figure S1. Association between the RUC time estimate and the work RVU recommended by the RUC**

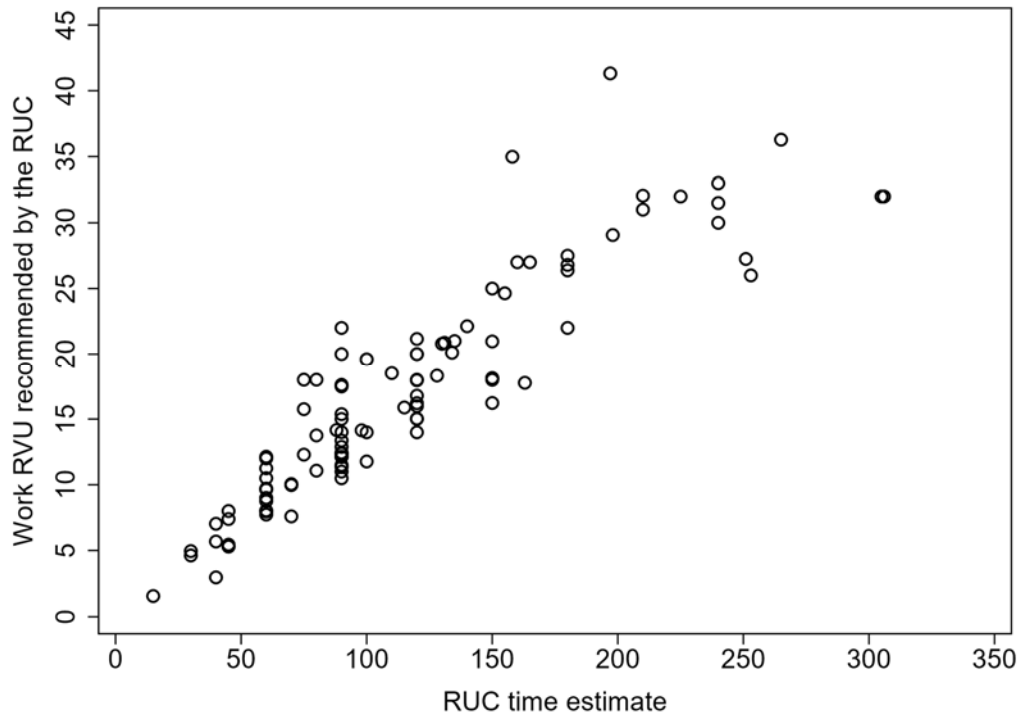

## 2. THE RUC REVIEW PROCESS

As we note in the manuscript, the review processes used by the Relative Value Scale Update Committee (RUC) have been described in detail in other publications.<sup>1,2,3,4</sup> We do not aim to recapitulate those descriptions here. Rather, we focus on elaborating several aspects of the Committee's workings, deeper understanding of which may provide useful context for interpreting our results.

Nominally, the Centers for Medicare and Medicaid Services sets the RUC's agenda. However, a range of other actors and procedures exert influence, both in decisions about which services are tabled for RUC review and in the reviews themselves. Indeed, those other actors and procedures are so relevant that the RUC is best understood as the nucleus of a larger valuation apparatus (see **Figure S2**).

Three influential actors in the RUC's orbit are the Current Procedural Terminology (CPT) Editorial Panel, the Specialty Society Advisory Committee, and the specialty societies more generally. The CPT Editorial Panel, another AMA-organized group, has an important agenda-setting role: it is tasked with adding, deleting, and revising service codes and their descriptions. Such modifications often trigger RUC reviews, and the two bodies coordinate closely with each other. The Specialty Society Advisory Committee consists of over 100 representatives of specialty societies; its members advocate when reviews that affect them are brought before the RUC.

Physician specialty societies have played an active role in the service valuation process since the RUC's inception. Societies lobby CMS and the RUC for review or re-review of specific services; they gather evidence to support their positions; they comment on recommendations developed by other societies; and they sometimes mobilize against proposed changes. Specialty societies in the AMA House of Delegates play a formal and direct role in preparing recommendations for the RUC and marshaling evidence to support those recommendations; this role includes actually conducting the physician surveys that produce the time and complexity measures RUC uses, as described in the manuscript.

The RUC's work is also shaped by policies and procedures. In 2006, for example, the RUC adopted objective standards that were intended to facilitate more systematic identification services that were at highest risk of being misvalued in their current form and hence most in need of review. A new body, the Relativity Assessment Workgroup, was established to lead this work and advise CMS and the RUC.

The reviews themselves can be characterized in various ways. As we note in the manuscript, they divide roughly equally into those that are valuations of new or modified services and those that involve revaluations of existing services. Another distinction that was relevant until relatively recently is between "annual reviews" and "five-year reviews". Annual reviews are the standard type of review; they involve ad hoc decisions to review selected services. The RUC, CMS, and specialty societies exercise substantial discretion over which services are selected for annual reviews.

Five-year reviews, by contrast, are a broader form of review and the RUC has much less discretion over which services are chosen for this type of review. The Omnibus Budget Reconciliation Act of 1990 mandated that the practice expenses and work RVUs associated with the entire Resource-Based Value Scale (RBVS) be reviewed every 5 years in order to correct misvalued services. For obvious reasons, it was infeasible to do this using the same process as the RUC uses for its annual reviews. The regulations also stipulated certain steps for five-year reviews, including a public comment period in their early stages. The RUC conducted four rounds of five-year reviews, resulting in changes to the Medicare Physician Fee Schedule in 1997, 2002, 2007, and 2012. Five-year reviews were discontinued after 2012 and replaced with the relativity assessment screening, which seeks to identify misvalued services on a rolling basis. Nonetheless, five-year reviews are relevant to our study because our study period spans years in which they were being conducted.

**Figure S2. The RUC review process**

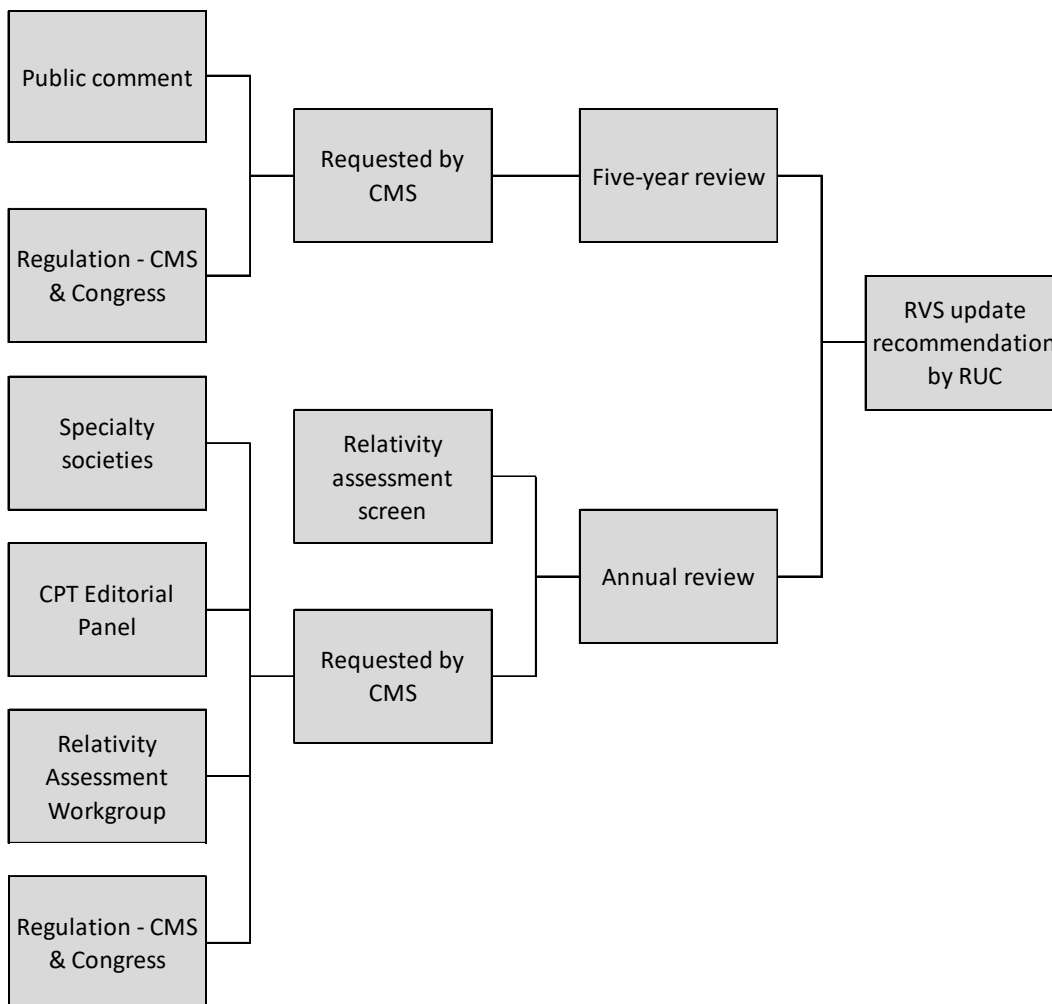

### 3. MEASUREMENT OF PROCEDURE TIME ACCURACY: CONCEPT AND CALCULATION

Our analytic approach was based on conceptualizing discrepancies between the RUC service time estimates and the NSQIP-derived benchmark times as consisting of two severable components: (1) discrepancy at the time of review; and (2) post-review changes in discrepancy.

*RUC time estimate.* For nearly all of the 293 procedures the RUC time estimates used in calculating discrepancies came from RUC reviews conducted between 1992 and 2015. However, a small number of the procedures in our sample had not undergone a RUC review through 2015. For these procedures, prevailing work RVUs were based on procedure times estimated at the inception of the Medicare Physician Fee Schedule;<sup>5</sup> we obtained those estimates. We call these time estimates  $RUC_i$  for a procedure  $i$  at the time of review.

*Measurement of discrepancy at review.* This component of accuracy relates to the difference between the RUC time estimate and the benchmark measure at the time of the RUC review. This difference is calculated as follows:

$$|RUC_i - NSQIP_{i,0}|$$

where  $RUC_i$  is the RUC’s survey-based time estimate for service  $i$  at the time of RUC review and  $NSQIP_{i,0}$  is the benchmark time for the same service during the same calendar quarter in which the RUC review of service  $i$  occurs. This produces an absolute difference (in minutes) between these two time values.

To address the fact that procedures vary considerably in length, we converted the observed discrepancies to proportions in several of the analyses. To ensure comparability to our other measure of discrepancy (changes subsequent to review) we chose as the denominator average NSQIP time over all calendar quarters in which the particular RVU was in force. Thus,

$$\text{Discrepancy at review}_i = \frac{(T + 1) \cdot |RUC_i - NSQIP_{i,0}|}{\sum_t NSQIP_{i,t}}$$

for service  $i$  that was subsequently observed in NSQIP calendar-quarters  $t = 0, \dots, T$ , relative to the RUC review.

*Measurement of changes in discrepancy after review.* NSQIP time measures for the sampled procedures are observed throughout the 2005-15 period. The average duration of most procedure changes over time, in some cases quite substantially. Hence, the discrepancy between the RUC time measure and the benchmark measure is dynamic. Such “drift” could be in either direction, increasing or decreasing the size of the discrepancy at review.

We calculated average NSQIP times for each procedure in the sample over the calendar-quarters  $0, \dots, T$  following the RUC review. We signed drift as positive if it went in the direction of the discrepancy at review and negative if it went in the opposite direction. As with our cross-sectional measures, to standardize across procedures of varying durations we calculated longitudinal changes as a proportion of average NSQIP time.

$$\text{Drift}_i = \text{Sign}(\text{RUC}_i - \text{NSQIP}_{i,0}) \frac{\sum_t (\text{NSQIP}_{i,t} - \text{NSQIP}_{i,0})}{\sum_t \text{NSQIP}_{i,t}}$$

*Total discrepancy.* **Figure S3** illustrates how the cross-sectional and longitudinal forms of discrepancy described above were measured and combined to produce a measure of total discrepancy in time.

The vertical height of the blue area in the figures at  $t=0$  represents gap between the RUC time estimate and the benchmark measure at the time of RUC review. The vertical height of the green area represents drift in the NSQIP-derived benchmark measures. In Panel A of **Figure S3**, drift in procedure time increases the total discrepancy. In Panel B drift decreases total discrepancy by reversing some of the discrepancy created at the moment of review.

Thus, total discrepancy consists of the sum of the two forms of discrepancy.

$$\text{Total discrepancy}_i = \text{Discrepancy at review}_i + \text{Drift}_i$$

In our data, drift was never larger in magnitude than discrepancy at review, ensuring that values for total time discrepancy were always positive.

**Figure S3. Total discrepancy as a function of cross-sectional and longitudinal discrepancies**

**A. Increases in total discrepancy resulting from changes in average procedure time following RUC review**

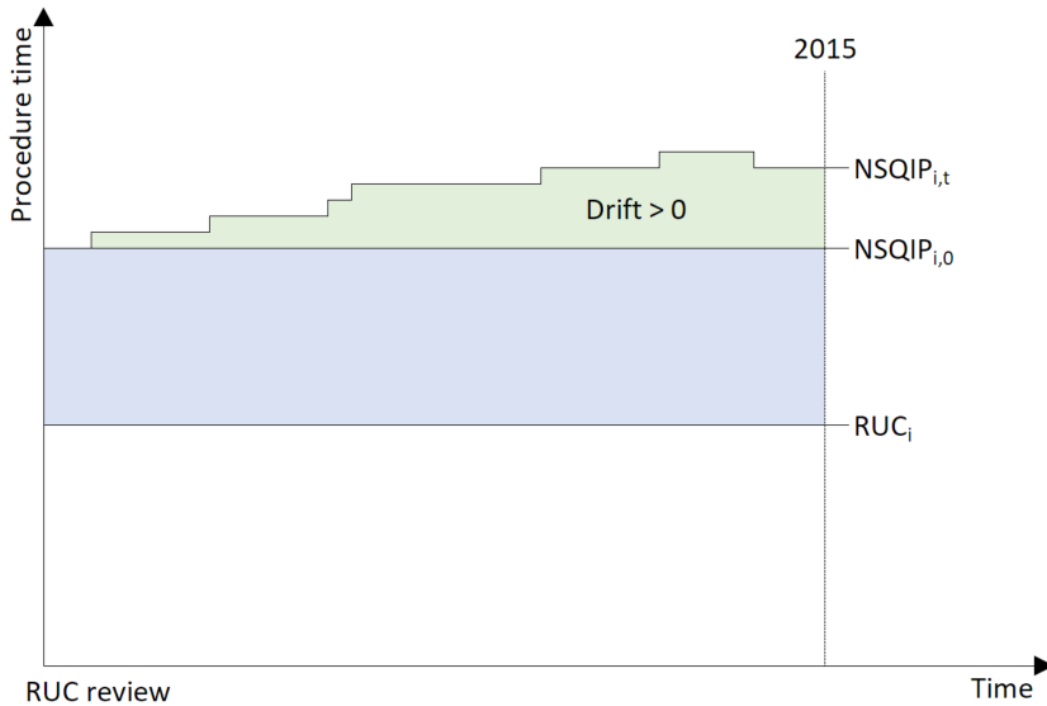

**B. Decreases in total discrepancy resulting from changes in average procedure time following RUC review**

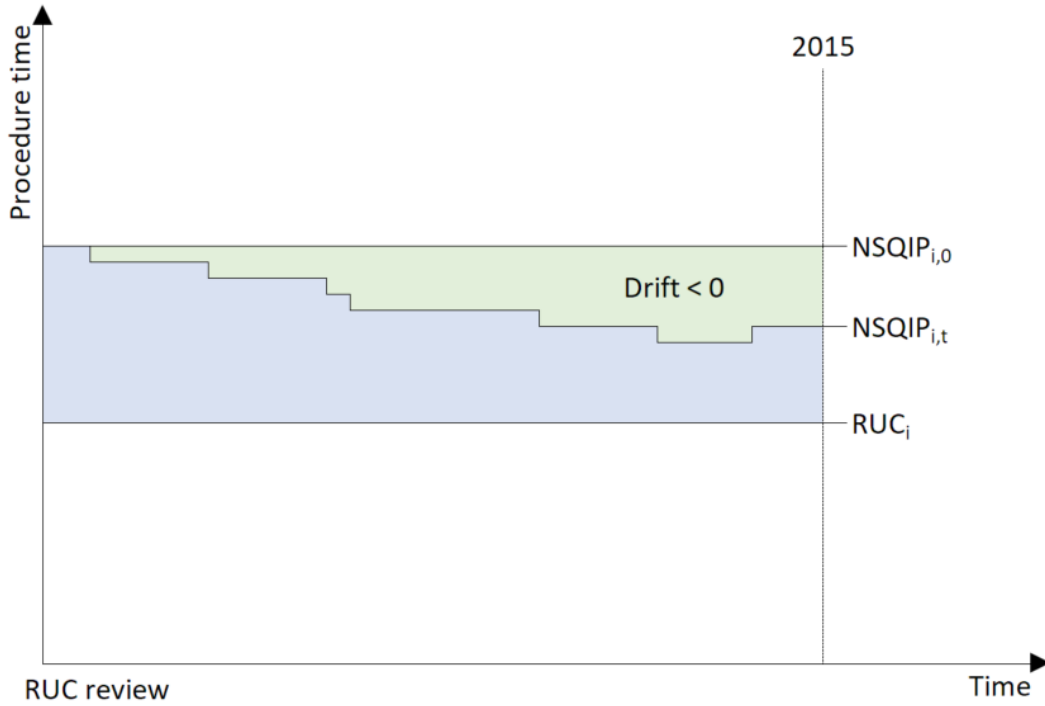

**4. ESTIMATION OF REVENUE IMPACTS**

Method of Calculation

Profit (or loss) was calculated by subtracting the counterfactual work revenue from the actual work revenue among the 293 procedures used in our analysis of revenue effects.

$$\text{Revenue Impact}_s = \text{Work revenue}_s - \text{Counterfactual work revenue}_s$$

Actual Medicare work-component revenue for each physician specialty was calculated as follows: multiply the total Medicare volume ( $Q_{i,s,y}$ ) for each procedure  $i$  performed by specialty  $s$  in year  $y$  by the CMS-approved work RVU ( $wRVU_{i,y}$ ), and the conversion factor ( $CF_y$ ) in force at the relevant time. Then aggregate procedure-specific payments across all procedures performed by the specialty  $s$  ( $i \in I_s$ ) from 2011 to 2015:

$$\text{Work revenue}_s = \sum_{i \in I_s} \sum_{y=2011}^{2015} (Q_{i,s,y} \times wRVU_{i,y} \times CF_y)$$

We estimated counterfactual payments by scaling each procedure’s work RVU by the proportion of work RVU attributed to intraservice time ( $\pi_{i,y}$ ) and the ratio of the up-to-date NSQIP time estimate to the prevailing RUC time in the period during which the Medicare claim was made:



$$\text{CF work revenue}_s = \sum_{i \in I_s} \sum_{y=2011}^{2015} \left( Q_{i,s,y} \times \text{wRVU}_{i,y} \times \text{CF}_y \times \left( 1 - \pi_{i,y} + \pi_{i,y} \frac{\text{NSQIP}_{i,y}}{\text{RUC}_{i,y}} \right) \right)$$

Work revenue is composed of two parts: (i) intraservice work, which is related to intraservice time and intraservice work per unit time (IWPUT), and (ii) pre- and post-service work. Since our analysis focuses on intraservice work, we hold pre- and post-service work constant with respect to any counterfactual change in intraservice time.

The constancy of pre- and post-service work is captured by the  $1 - \pi_{i,y}$  term in the inner parentheses that does not depend on the relationship between NSQIP and RUC intraservice times. Discrepancies between NSQIP and RUC intraservice times only affect the work RVUs via the intraservice work, the last term in the inner parentheses. In order to calculate  $\pi_{i,y}$ , we use data provided by the RUC on all services and time components for each CPT code at the time of review, e.g., evaluation pre-service time; positioning pre-service time; scrub, dress, and wait pre-service time; immediate post-service time; and subsequent visits. Each of these pre- and post-service components has a pre-defined intensity, which the RUC also shared with us. Denoting pre- and post-service components as  $q_{c,i,y}$  and corresponding intensities as  $p_c$ , intraservice work is thus known as

$$\text{Intraservice work}_{i,y} \equiv \text{wRVU}_{i,y} - \sum_c q_{c,i,y} p_c.$$

This gives us  $\pi_{i,y} \equiv \text{Intraservice work}_{i,y} / \text{wRVU}_{i,y}$ ,

This ratio-scaling technique used to estimate counterfactual work payments is based on underlying logic of the RBRVS. Specifically, work is thought to be a product of time and intensity or “intraservice work per unit time” (IWPUT). The latter concept of intensity is thought to be a latent function of (i) technical skill and physical effort, (ii) mental effort and judgment, and (iii) psychologic stress. This design treats intensity as independent of procedure time; increasing procedure time while holding intensity constant would be consistent with our approach.

### Robustness of Scaling Assumption

We cannot fully test the assumption that intensity (or IWPUT) will be held constant if counterfactual intraservice time estimates were used by the RUC. However, we conducted additional analyses of RUC data to test this assumption. Specifically, we first calculate  $\text{IWPUT}_{i,y} \equiv \text{Intraservice work}_{i,y} / \text{RUC}_{i,y}$  then analyze (i) how  $\text{IWPUT}_{i,y}$  changes over time within the same service and (ii) how it changes when  $\text{RUC}_{i,y}$  changes.

In **Figure S4** below, we show the relationship between  $\text{IWPUT}_{i,y}$  and  $\text{IWPUT}_{i,y'}$  for CPT codes that are evaluated by the RUC on separate years  $y$  and  $y'$ . The figure shows an upward sloping relationship, which indicates that codes with a high IWPUT are likely to remain with a high

IWPUT on revaluation, even when the intraservice time changes. However, there does appear to be some reversion to the mean.

**Figure S4. Changes in IWPUT measures among procedures re-reviewed by the RUC.**

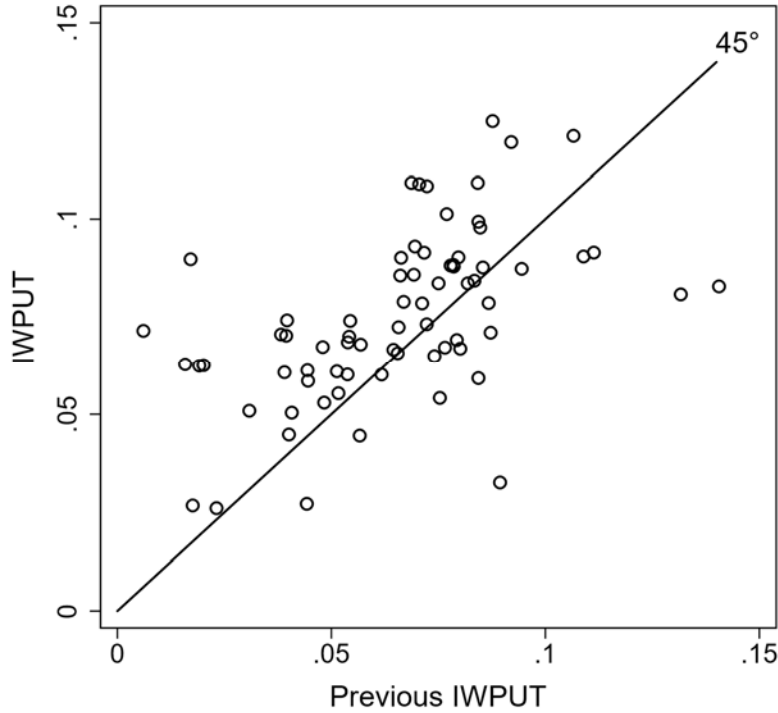

We find further direct evidence to support our assumption that IWPUT does not change *on average* as intraservice time increases or decreases by running the following regression,

$$IWPUT_{i,y} = \beta RUC_{i,y} + \alpha_i + \eta_y + \varepsilon_{i,y} ,$$

which measures the relationship between changes in IWPUT and changes in intraservice times for CPT codes with more than one review. We find a small and statistically insignificant estimate of  $\hat{\beta} = -0.000091$  RVU per minute squared. Given that the standard deviation of intraservice time changes is 30 minutes, and the standard deviation of IWPUT values is 0.025 RVUs per minute among surgical codes (and 0.038 among all codes), this means that a standard deviation change in intraservice times is related to only a tenth of a standard deviation in IWPUT values. **Figure S5** below shows this regression result graphically.

**Figure S5. Relationship between change in intraservice time and change in IWPUT**

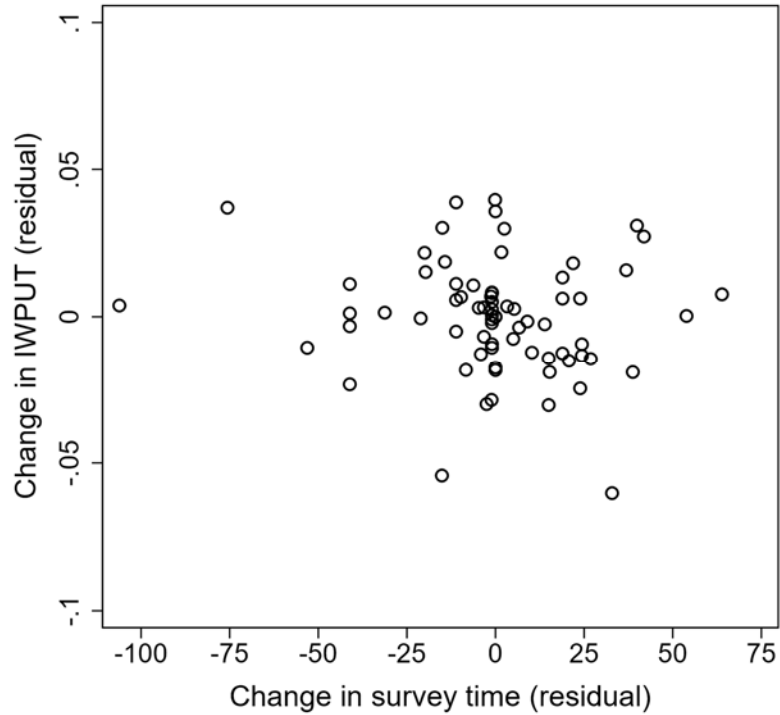

#### Revenue Impacts at Surgeon Level

Figure 3 in the manuscript reports the estimated effects of inaccuracies in the RUC measures of procedure time at the specialty level.

**Figure S6** (below) presents these results at the surgeon level. They should be interpreted as the average loss or gain in revenue for surgeons in each specialty. However, the gains and losses for particular surgeons may be substantially higher or lower than this average, depending on the mix and volume of procedures they perform.

**Figure S6. Average effect of time inaccuracies for 293 procedures on Medicare reimbursement for physicians in 8 surgical specialties, 2011-15 \***

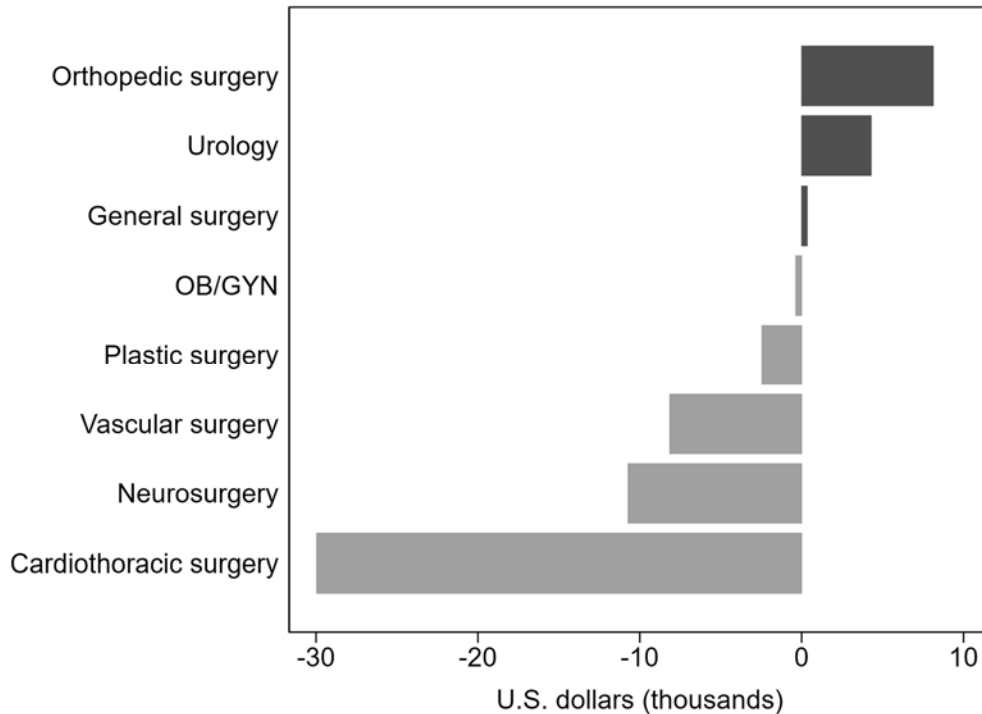

\* We were able to obtain reliable data indicating the size of the practicing population of cardiac surgeons and thoracic surgeons *combined*, but not separate counts for these specialties. Therefore, we combined them for purposes of this figure.

## 5. PROCEDURE TIME DISCREPANCY AND PROBABILITY OF RUC REVIEW

As noted in the manuscript, this analysis used a procedure-RUC meeting level dataset consisting of 8,071 observations (293 procedures in up to 31 meetings per procedure). The dataset included 61 annual reviews and 41 5-year reviews.

The outcome variable specified whether a procedure was reviewed at a meeting. The independent variable of interest was the time discrepancy (positive or negative) for the procedure in the year of the meeting. The model adjusted for absolute NSQIP time, the number of quarters since the procedure's last RUC review, the volume of the procedures in the relevant year (as determined from the PSPS data), and the work RVU. To allow for nonlinear relationships, we constructed restricted cubic splines of the time discrepancy. To calculate 95% confidence intervals we bootstrapped the model using 200 iterations with resampling.

Panel A of **Figure S7** shows the results for annual reviews, and Panel B shows the results for five-year reviews. (For an explanation of the differences between these 2 types of reviews, see Section 2 above.)

**Figure S7. Relationship between procedure time discrepancy and selection for RUC review\***

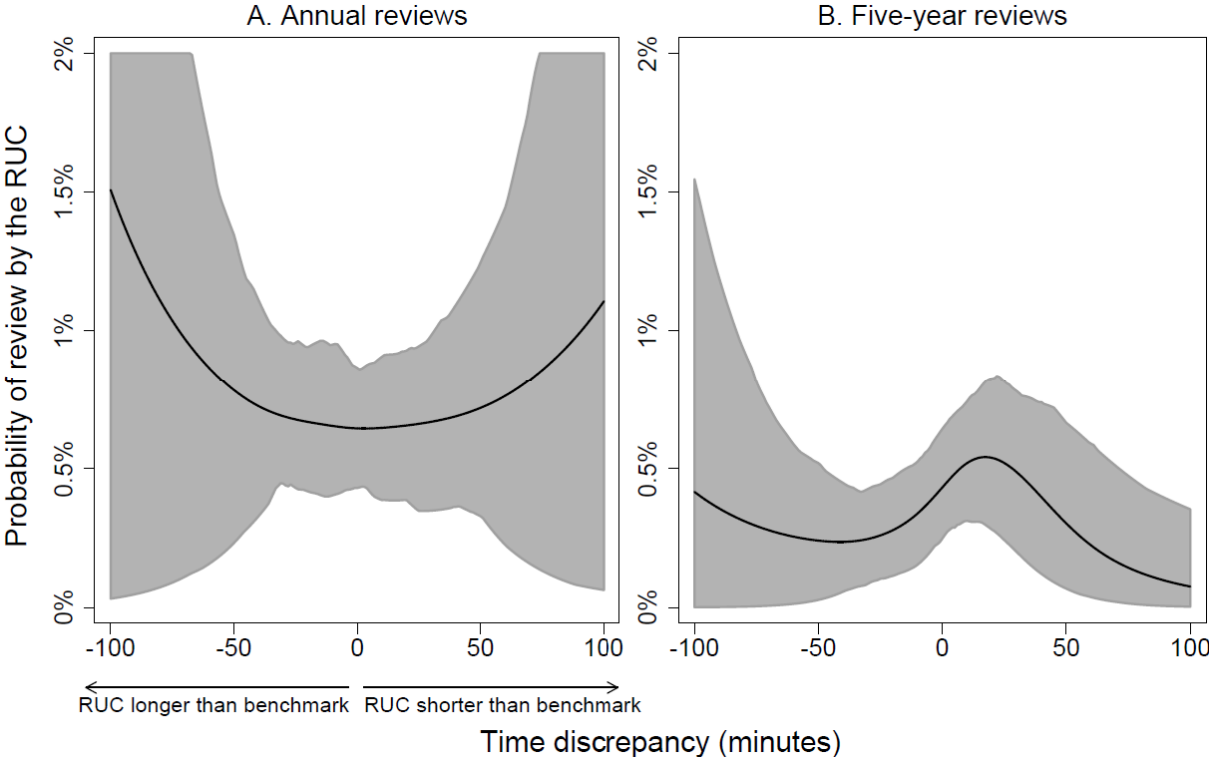

\* Shading indicates 95% confidence intervals.

**6. SENSITIVITY ANALYSES: TESTING POTENTIAL EFFECTS OF NON-REPRESENTATIVENESS IN NSQIP ON RESULTS**

Sensitivity Analysis #1: Weighted Analyses

We conducted additional analyses to explore whether the non-representativeness of NSQIP hospitals adversely affected the quality of our benchmark time estimates—and hence the validity of our discrepancy measures. Specifically, we constructed probabilistic weights to make the NSQIP sample more representative of the Medicare population, recalculated NSQIP times using those weights, and then compared those times to unweighted NSQIP times. These sensitivity analyses suggest that demographic differences between the populations of surgical cases in NSQIP and Medicare generally did not affect our main findings.

The data used to create the weights came from demographic information drawn from two sources: (1) the NSQIP Public Use Files for 2005-15; and (2) a 5% sample of final action Physician/Supplier Part B claims for the 2005-2013 from CMS. Both sources include procedure-level information on patients’ age, gender, and race. A comparison of these demographic characteristics among patients who underwent the procedures in our sample showed that, on average, NSQIP patients were younger and more racially diverse than Medicare patients.

We used iterative proportional fitting (or “raking”) to construct probabilistic weights at the procedure level. Raking allocates a value to each case in the NSQIP sample such that the weighted distribution of the NSQIP sample is similar to the marginal distribution of the Medicare population. The following categories were used: white race, sex, age under 65, age 65 to 69, age 70 to 74, and age 75 and over. When one category made up less than 5% of procedures in the Medicare population, we excluded it from that procedure’s weight-generating process to ensure that the raking algorithm converged. For example, sex was not used to construct weights for hysterectomies because the procedure is performed exclusively on female patients.

**Figure S8** presents a binned scatter plot of 8,348 weighted and unweighted NSQIP time estimates, which were measured at the procedure-calendar quarter level. We divided the sample into 20 equally-sized bins and computed the mean of the weighted and unweighted time estimates within each bin. The plot indicates that the weighted NSQIP time estimates for the procedures in our sample were not systematically larger or smaller than unweighted estimates.

We also replicated the analysis of cross-sectional accuracy using weighted time estimates and compared them to the results reported in Figure 1 of the manuscript. The red circles in **Figure S9** represent the weighted time estimates and the black circles represent the unweighted estimates. Bivariate linear regression analysis using weighted time estimates produced a coefficient of 1.09 (95% Confidence Interval, 1.05-1.13) and an R-squared value of 0.96.

**Figure S8. Relationship between weighted and unweighted NSQIP time measures**

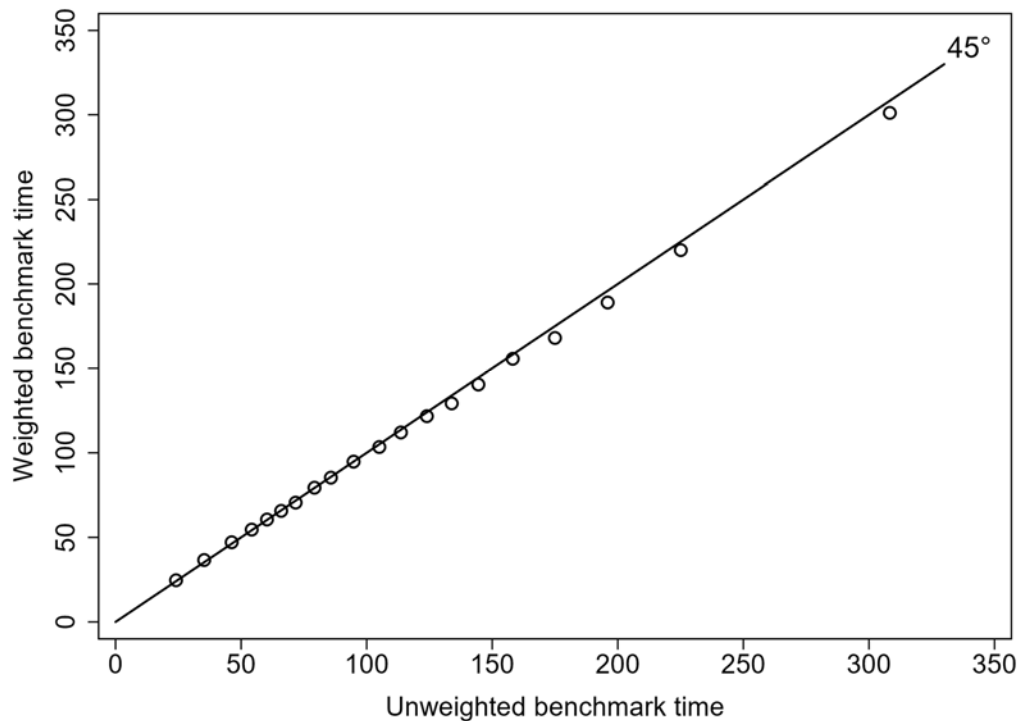

**Figure S9. Association between RUC survey time estimates and weighted NSQIP time measures**

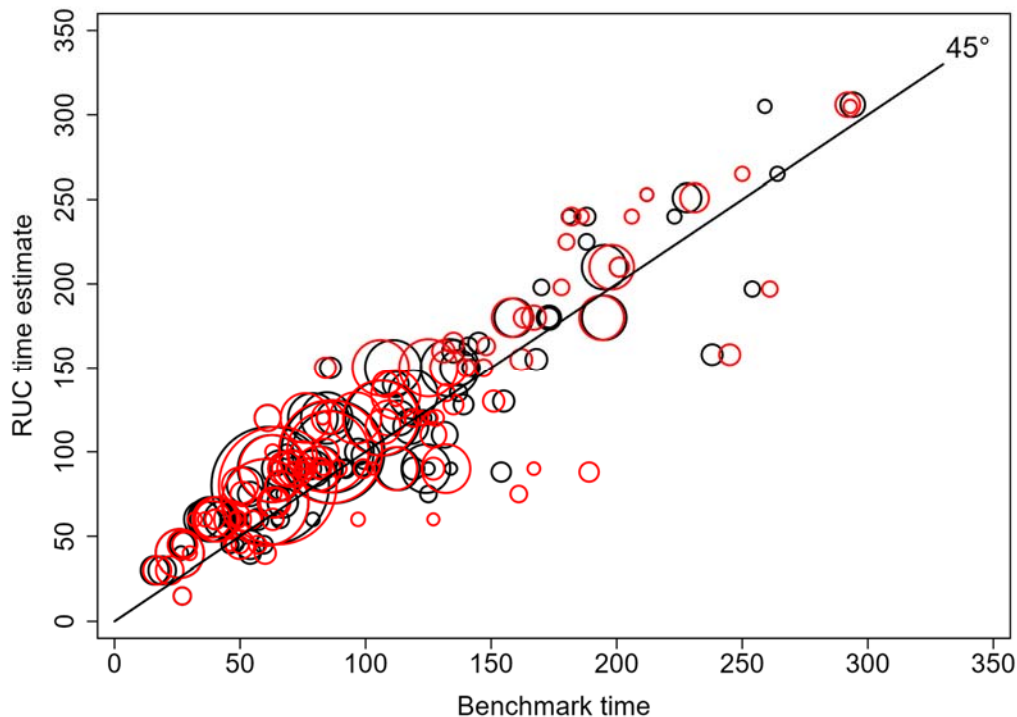

#### Sensitivity Analysis #2: Trend Analyses

As a second analysis of the sensitivity of our findings to non-representativeness in the NSQIP sample, we investigated whether summary measures of the discrepancy between NSQIP times and the RUC time were sensitive to the year of comparison to NSQIP data. The NSQIP sample has become more representative over time, as more and more hospitals joined the program and began contributing cases. Therefore, the intuition behind this sensitivity analysis is that, if our results are affected by non-representativeness among NSQIP cases, we would expect any resulting biases to attenuate over time.

**Figure S10** shows summary measures of the NSQIP-RUC discrepancy for each procedure at the time of review. We represent NSQIP times that were smaller than the RUC time as a “negative” discrepancy and NSQIP times that were larger than the RUC time as a “positive” discrepancy. We also recognize, as we did in our main analysis, that discrepancies may be calculated by reference to benchmark values that are defined either as means or medians of the distribution of time values from which the benchmarks are derived. We present both in Figure S10.

In sum, Figure S10 indicates no clear trend over the 2005-15 period. If there is any trend at all, discrepancies become slightly more positive over time—in other words, NSQIP times became slightly *longer* relative to the RUC time as the NSQIP sample became more representative. This suggests either that the bias from NSQIP sampling slightly underestimates NSQIP times relative to the RUC times. Alternatively, for this interpretation to be incorrect, changes in the RUC estimates would have had to almost exactly offset changes in the bias due to NSQIP sampling over time. This alternative interpretation is convoluted and much less plausible.

Thus, both of our sensitivity analyses point toward the conclusion that the results reported in Figure 1 of the manuscript (as well as our other results) are not substantially affected by non-representativeness in NSQIP sampling. To the extent any bias arises from this non-representativeness, it is likely to be small.

**Figure S10. NSQIP-RUC discrepancy as function of calendar year, 2005-2015**

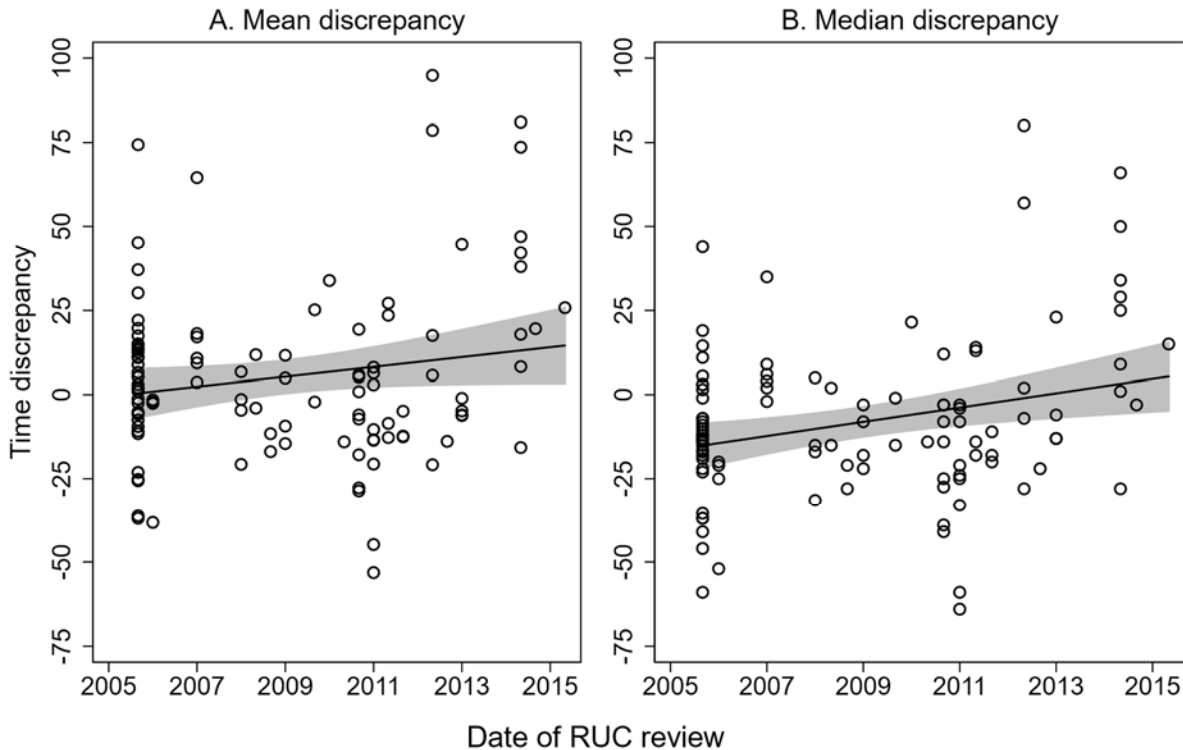

## 7. ALTERNATIVE MEASURES OF THE ACCURACY OF RUC TIME ESTIMATES

### Mean- and Median-defined Benchmark Values

In seeking to reconcile our results with those of previous studies of RUC time estimates, we state: “Our finding that the RUC does not systematically overestimate procedure times conflicts with results from prior studies. The conflict may be partially explained by the fact that prior studies have benchmarked using median time values. Using median rather than mean NSQIP times in our data showed that RUC time estimates tended to be 9% longer at the time of review [ $\beta$ , 1.09 (95% confidence interval, 1.06 to 1.13,  $P < 0.001$ )] (see Figure S11).”

**Figure S11** appears below. The methodology used to produce the plot is identical to the one used for Figure 1, except median values of the NSQIP times for each procedure were used as the benchmark.



**Figure S11. Relationship between RUC time estimates and median-based benchmark times for 108 reviews of common surgical procedures\***

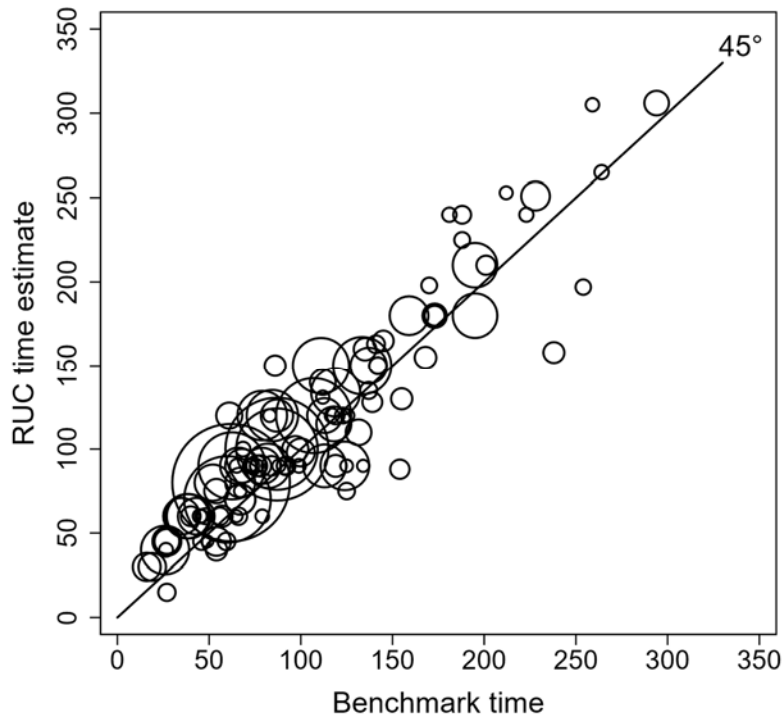

\* Each bubble represents a surgical procedure reviewed by the RUC in 2005-2015. Bubble size represents frequency of the procedures in NSQIP.

The choice of mean-based or median-based measures of discrepancy is debatable. Although most previous studies have defined benchmarks according to median values, we believe that mean values have an equally if not more compelling claim. In one part of our study, however—the analysis of revenue impacts—mean-based measures are clearly the superior choice. The reason is that we are estimating revenue effects across entire specialties. The specialty-wide revenue impact for procedure  $k$  in specialty  $m = [\text{mean discrepancy for procedure } k \times \text{number of times procedure } k \text{ is performed by surgeons in the specialty } m]$ . Using a median discrepancy value in this calculation would produce an irrelevant result (unless the mean and median discrepancies happened to be the same). This example from our study illustrates that, in evaluations that involve aggregative calculations across groups, mean values may, for mathematical reasons, be the appropriate way to define benchmarks and discrepancies.

### Systematic and Idiosyncratic Forms of Discrepancy

Another important distinction in measurement of time inaccuracies relates to the difference between “systematic” and “idiosyncratic” forms of discrepancy.

Systematic discrepancy refers to comparisons of average values of RUC and NSQIP times for a sample of services. Most previous studies of RUC times have centered on this form of discrepancy, in part because the studies were motivated by concerns that RUC processes tended to overestimate service times. The coefficient reported for the regression analysis associated

with Figure 1 addresses systematic discrepancy. We do not find evidence of systematic discrepancy in our study sample as a whole.

Idiosyncratic discrepancy, on the other hand, refers to discrepancies between the RUC and NSQIP time values on a procedure-by-procedure basis. The lack of systematic discrepancy we observe may logically coexist with significant idiosyncratic discrepancy, because zero average discrepancy is compatible with substantial dispersion in the discrepancies. Measurement error from small survey samples, such as those the RUC uses to estimate service time, may be one source of idiosyncratic discrepancy. If service-specific time discrepancies are spread unevenly across specialties, they may lead to larger pay distortions in some specialties than others.

We measured idiosyncratic discrepancies in several ways. First, we calculated simple differences between RUC time estimates and NSQIP times for each procedure; these are depicted in Figure 1 as deviations from 45-degree and summarized by the “mean absolute discrepancy” statistic we report. Second the bars in Figure 2 show the distribution of discrepancies across procedures, with the light gray segments indicating absolute discrepancies at the time of RUC review and the dark gray segments indicating changes in the size of absolute discrepancies over time.

Finally, our revenue analysis (Figure 3) examines how discrepancies are distributed among selected specialties. Thus, this analysis decomposes how discrepancies may be idiosyncratic as opposed to systematic from a specialty perspective: Idiosyncratic discrepancies will cancel out when aggregated at the specialty level, while systematic discrepancies will imply revenue reallocations at the specialty level when moving from RUC to NSQIP times. We find that revenue reallocations (relative to an idealized counterfactual distribution estimated off benchmark times) are non-trivial in size, but generally smaller than the mean absolute discrepancy (i.e., mean absolute deviation in regression terms) of 17.4%. This suggests that much of the discrepancy is idiosyncratic and not systematically distributed across specialties.

## 8. TIME ESTIMATES

The following table shows the RUC time estimate and the NSQIP time estimate for each of the 293 procedures that underwent RUC review in 1992-2015. The table also shows the number of NSQIP cases that were used to derive the benchmark time estimate.

**Table S12. Time values for 293 procedures**

|   | CPT   | Year of RUC review | Number of surgical cases in NSQIP | RUC survey time | NSQIP time estimate (median) | NSQIP time estimate (mean) |
|---|-------|--------------------|-----------------------------------|-----------------|------------------------------|----------------------------|
| 1 | 10140 | 1992               | 4,677                             | 16              |                              |                            |
| 2 | 10140 | 2010               | 4,677                             | 15              | 27                           | 34.4                       |
| 3 | 10180 | 1992               | 2,897                             | 20              |                              |                            |
| 4 | 11005 | 2004               | 2,240                             | 120             |                              |                            |
| 5 | 11042 | 1992               | 9,825                             | 30              |                              |                            |

|    |       |      |        |     |       |       |
|----|-------|------|--------|-----|-------|-------|
| 6  | 11042 | 2005 | 9,825  | 15  |       |       |
| 7  | 11042 | 2010 | 9,825  | 15  |       |       |
| 8  | 11043 | 1992 | 7,260  | 49  |       |       |
| 9  | 11043 | 1995 | 7,260  | 45  |       |       |
| 10 | 11043 | 2010 | 7,260  | 30  |       |       |
| 11 | 11044 | 1992 | 4,121  | 79  |       |       |
| 12 | 11044 | 1995 | 4,121  | 90  |       |       |
| 13 | 11044 | 2010 | 4,121  | 45  |       |       |
| 14 | 14301 | 2009 | 2,914  | 100 |       |       |
| 15 | 15734 | 1992 | 4,945  | 194 |       |       |
| 16 | 15734 | 2005 | 4,945  | 163 | 141   | 178.1 |
| 17 | 15830 | 2006 | 7,985  | 120 |       |       |
| 18 | 19020 | 1992 | 3,892  | 28  |       |       |
| 19 | 19020 | 2002 | 3,892  | 48  |       |       |
| 20 | 19120 | 1992 | 42,303 | 35  |       |       |
| 21 | 19120 | 1995 | 42,303 | 45  |       |       |
| 22 | 19125 | 1993 | 48,633 | 60  |       |       |
| 23 | 19160 | 1992 | 3,028  | 52  |       |       |
| 24 | 19180 | 1992 | 2,336  | 73  |       |       |
| 25 | 19180 | 2005 | 2,336  | 90  | 134   | 164.4 |
| 26 | 19301 | 2007 | 67,429 | 60  |       |       |
| 27 | 19302 | 2010 | 10,754 | 100 | 97    | 105.9 |
| 28 | 19303 | 2005 | 57,229 | 90  |       |       |
| 29 | 19304 | 1992 | 4,750  | 94  |       |       |
| 30 | 19307 | 1992 | 28,601 | 104 |       |       |
| 31 | 19316 | 1992 | 2,744  | 110 |       |       |
| 32 | 19318 | 1995 | 18,193 | 150 |       |       |
| 33 | 19325 | 1992 | 4,688  | 71  |       |       |
| 34 | 19325 | 1995 | 4,688  | 90  |       |       |
| 35 | 19340 | 1992 | 4,843  | 88  |       |       |
| 36 | 19340 | 2009 | 4,843  | 120 | 119   | 145.2 |
| 37 | 19342 | 1992 | 4,605  | 115 |       |       |
| 38 | 19357 | 2010 | 10,360 | 110 | 131.5 | 143.9 |
| 39 | 19364 | 1992 | 4,308  | 428 |       |       |
| 40 | 19364 | 1998 | 4,308  | 390 |       |       |
| 41 | 19371 | 1992 | 2,392  | 117 |       |       |
| 42 | 19380 | 1992 | 6,563  | 89  |       |       |
| 43 | 22551 | 2010 | 26,625 | 120 |       |       |
| 44 | 22554 | 1992 | 4,542  | 142 |       |       |
| 45 | 22554 | 1995 | 4,542  | 120 |       |       |
| 46 | 22554 | 2005 | 4,542  | 90  |       |       |
| 47 | 22558 | 1992 | 7,408  | 217 |       |       |
| 48 | 22558 | 1995 | 7,408  | 180 |       |       |

|    |       |      |         |     |      |       |
|----|-------|------|---------|-----|------|-------|
| 49 | 22600 | 1992 | 3,274   | 167 |      |       |
| 50 | 22600 | 1995 | 3,274   | 120 |      |       |
| 51 | 22612 | 1992 | 17,842  | 165 |      |       |
| 52 | 22612 | 1995 | 17,842  | 150 |      |       |
| 53 | 22612 | 2005 | 17,842  | 150 |      |       |
| 54 | 22630 | 1992 | 7,069   | 225 |      |       |
| 55 | 22630 | 1995 | 7,069   | 180 |      |       |
| 56 | 22633 | 2011 | 6,321   | 200 |      |       |
| 57 | 23412 | 1992 | 3,401   | 93  |      |       |
| 58 | 23412 | 2008 | 3,401   | 100 | 68.5 | 79.3  |
| 59 | 23472 | 1992 | 10,451  | 142 |      |       |
| 60 | 23472 | 1995 | 10,451  | 155 |      |       |
| 61 | 23472 | 2000 | 10,451  | 165 |      |       |
| 62 | 23472 | 2012 | 10,451  | 140 | 112  | 119.2 |
| 63 | 23515 | 1992 | 2,648   | 83  |      |       |
| 64 | 23515 | 2007 | 2,648   | 90  | 88   | 100.8 |
| 65 | 23615 | 1992 | 2,470   | 103 |      |       |
| 66 | 23615 | 1995 | 2,470   | 120 |      |       |
| 67 | 23615 | 2007 | 2,470   | 90  | 125  | 154.6 |
| 68 | 25111 | 1992 | 3,753   | 41  |      |       |
| 69 | 25447 | 1992 | 3,263   | 117 |      |       |
| 70 | 25447 | 2005 | 3,263   | 100 |      |       |
| 71 | 25607 | 2006 | 3,476   | 60  |      |       |
| 72 | 25608 | 2006 | 3,049   | 90  |      |       |
| 73 | 25609 | 2006 | 3,092   | 120 |      |       |
| 74 | 26615 | 1992 | 2,252   | 56  |      |       |
| 75 | 26615 | 2007 | 2,252   | 45  | 49   | 54.4  |
| 76 | 27125 | 1992 | 11,100  | 84  |      |       |
| 77 | 27130 | 1992 | 104,562 | 128 |      |       |
| 78 | 27130 | 2005 | 104,562 | 135 |      |       |
| 79 | 27130 | 2013 | 104,562 | 100 | 87   | 94.0  |
| 80 | 27132 | 1992 | 3,020   | 194 |      |       |
| 81 | 27134 | 1992 | 7,348   | 238 |      |       |
| 82 | 27134 | 1995 | 7,348   | 240 |      |       |
| 83 | 27137 | 1992 | 2,431   | 161 |      |       |
| 84 | 27137 | 1995 | 2,431   | 180 |      |       |
| 85 | 27236 | 1992 | 18,108  | 89  |      |       |
| 86 | 27236 | 2005 | 18,108  | 90  |      |       |
| 87 | 27236 | 2012 | 18,108  | 90  | 68   | 76.2  |
| 88 | 27244 | 1992 | 9,345   | 79  |      |       |
| 89 | 27244 | 2008 | 9,345   | 75  | 54   | 63.4  |
| 90 | 27245 | 1992 | 20,765  | 85  |      |       |
| 91 | 27245 | 2008 | 20,765  | 80  | 52   | 63.1  |

|     |       |      |         |     |    |       |
|-----|-------|------|---------|-----|----|-------|
| 92  | 27301 | 1992 | 2,354   | 44  |    |       |
| 93  | 27446 | 1992 | 6,113   | 105 |    |       |
| 94  | 27446 | 2013 | 6,113   | 90  | 84 | 88.9  |
| 95  | 27447 | 1992 | 166,998 | 139 |    |       |
| 96  | 27447 | 2005 | 166,998 | 124 |    |       |
| 97  | 27447 | 2013 | 166,998 | 100 | 87 | 93.8  |
| 98  | 27486 | 1992 | 4,304   | 141 |    |       |
| 99  | 27486 | 1995 | 4,304   | 150 |    |       |
| 100 | 27487 | 1992 | 8,204   | 195 |    |       |
| 101 | 27487 | 1995 | 8,204   | 200 |    |       |
| 102 | 27590 | 1992 | 11,789  | 69  |    |       |
| 103 | 27650 | 1992 | 2,245   | 68  |    |       |
| 104 | 27650 | 2008 | 2,245   | 60  | 65 | 66.7  |
| 105 | 27792 | 1992 | 4,777   | 83  |    |       |
| 106 | 27792 | 2007 | 4,777   | 60  | 66 | 77.1  |
| 107 | 27792 | 2011 | 4,777   | 60  | 56 | 62.9  |
| 108 | 27814 | 1992 | 5,489   | 87  |    |       |
| 109 | 27814 | 2007 | 5,489   | 90  | 92 | 93.6  |
| 110 | 27822 | 1992 | 2,963   | 106 |    |       |
| 111 | 27822 | 2000 | 2,963   | 90  |    |       |
| 112 | 27822 | 2007 | 2,963   | 90  | 99 | 108.1 |
| 113 | 27880 | 1992 | 14,091  | 68  |    |       |
| 114 | 27880 | 2005 | 14,091  | 80  | 67 | 74.9  |
| 115 | 27882 | 1992 | 2,585   | 53  |    |       |
| 116 | 28805 | 1992 | 4,021   | 66  |    |       |
| 117 | 28805 | 2005 | 4,021   | 60  | 48 | 54.6  |
| 118 | 29806 | 2001 | 3,221   | 100 |    |       |
| 119 | 29806 | 2002 | 3,221   | 100 |    |       |
| 120 | 29807 | 2001 | 3,618   | 90  |    |       |
| 121 | 29822 | 1992 | 3,375   | 69  |    |       |
| 122 | 29823 | 1992 | 3,229   | 84  |    |       |
| 123 | 29824 | 2001 | 3,078   | 60  |    |       |
| 124 | 29826 | 1992 | 7,154   | 95  |    |       |
| 125 | 29826 | 2010 | 7,154   | 60  | 57 | 65.2  |
| 126 | 29826 | 2011 | 7,154   | 40  | 54 | 63.6  |
| 127 | 29827 | 2002 | 17,933  | 120 |    |       |
| 128 | 29877 | 1992 | 5,456   | 69  |    |       |
| 129 | 29879 | 1992 | 2,275   | 68  |    |       |
| 130 | 29880 | 1992 | 13,116  | 80  |    |       |
| 131 | 29880 | 2011 | 13,116  | 45  | 27 | 32.3  |
| 132 | 29881 | 1992 | 36,423  | 66  |    |       |
| 133 | 29881 | 2011 | 36,423  | 40  | 26 | 31.5  |
| 134 | 29888 | 1992 | 12,309  | 127 |    |       |

|     |       |      |        |     |     |       |
|-----|-------|------|--------|-----|-----|-------|
| 135 | 29888 | 2008 | 12,309 | 98  | 100 | 109.8 |
| 136 | 32480 | 1992 | 7,623  | 131 |     |       |
| 137 | 32480 | 1993 | 7,623  | 180 |     |       |
| 138 | 32480 | 1995 | 7,623  | 180 |     |       |
| 139 | 32480 | 2000 | 7,623  | 155 |     |       |
| 140 | 32650 | 1993 | 2,266  | 90  |     |       |
| 141 | 32657 | 2005 | 2,870  | 60  | 79  | 90.2  |
| 142 | 32663 | 1993 | 7,325  | 240 |     |       |
| 143 | 32663 | 2005 | 7,325  | 145 |     |       |
| 144 | 32663 | 2011 | 7,325  | 155 | 168 | 182.2 |
| 145 | 32666 | 2011 | 5,149  | 75  |     |       |
| 146 | 33405 | 1992 | 3,681  | 186 |     |       |
| 147 | 33405 | 2000 | 3,681  | 240 |     |       |
| 148 | 33405 | 2005 | 3,681  | 198 |     |       |
| 149 | 33405 | 2012 | 3,681  | 197 | 254 | 275.6 |
| 150 | 33533 | 2000 | 6,915  | 155 |     |       |
| 151 | 33533 | 2005 | 6,915  | 151 |     |       |
| 152 | 33533 | 2012 | 6,915  | 158 | 238 | 252.9 |
| 153 | 34101 | 1992 | 2,405  | 68  |     |       |
| 154 | 34101 | 2000 | 2,405  | 60  |     |       |
| 155 | 34201 | 1992 | 6,159  | 65  |     |       |
| 156 | 34201 | 2000 | 6,159  | 75  |     |       |
| 157 | 34201 | 2005 | 6,159  | 128 | 139 | 142.6 |
| 158 | 34800 | 2000 | 3,087  | 120 |     |       |
| 159 | 34802 | 2000 | 17,802 | 150 |     |       |
| 160 | 34803 | 2004 | 10,549 | 165 |     |       |
| 161 | 34804 | 2000 | 3,061  | 150 |     |       |
| 162 | 35081 | 1992 | 5,781  | 167 |     |       |
| 163 | 35081 | 1995 | 5,781  | 203 |     |       |
| 164 | 35081 | 2005 | 5,781  | 210 | 201 | 215.4 |
| 165 | 35091 | 1992 | 2,311  | 249 |     |       |
| 166 | 35091 | 1995 | 2,311  | 249 |     |       |
| 167 | 35102 | 1992 | 3,191  | 247 |     |       |
| 168 | 35102 | 1995 | 3,191  | 240 |     |       |
| 169 | 35102 | 2005 | 3,191  | 265 | 264 | 271.5 |
| 170 | 35141 | 1992 | 2,699  | 145 |     |       |
| 171 | 35141 | 2000 | 2,699  | 150 |     |       |
| 172 | 35301 | 1992 | 88,863 | 120 |     |       |
| 173 | 35301 | 1995 | 88,863 | 144 |     |       |
| 174 | 35301 | 2013 | 88,863 | 120 | 107 | 115.2 |
| 175 | 35302 | 2006 | 2,269  | 150 |     |       |
| 176 | 35355 | 1992 | 2,418  | 174 |     |       |
| 177 | 35355 | 2000 | 2,418  | 120 |     |       |

|     |       |      |        |     |     |       |
|-----|-------|------|--------|-----|-----|-------|
| 178 | 35371 | 1992 | 7,770  | 118 |     |       |
| 179 | 35371 | 2000 | 7,770  | 103 |     |       |
| 180 | 35556 | 1992 | 12,944 | 156 |     |       |
| 181 | 35556 | 1995 | 12,944 | 200 |     |       |
| 182 | 35556 | 2005 | 12,944 | 251 | 228 | 243.5 |
| 183 | 35566 | 1992 | 9,478  | 218 |     |       |
| 184 | 35566 | 1995 | 9,478  | 258 |     |       |
| 185 | 35566 | 2005 | 9,478  | 306 | 294 | 311.2 |
| 186 | 35571 | 1992 | 3,375  | 193 |     |       |
| 187 | 35571 | 2000 | 3,375  | 180 |     |       |
| 188 | 35583 | 1992 | 2,610  | 188 |     |       |
| 189 | 35583 | 1995 | 2,610  | 220 |     |       |
| 190 | 35583 | 2005 | 2,610  | 253 | 212 | 227.4 |
| 191 | 35585 | 1992 | 2,792  | 233 |     |       |
| 192 | 35585 | 1995 | 2,792  | 270 |     |       |
| 193 | 35585 | 2005 | 2,792  | 305 | 259 | 279.8 |
| 194 | 35646 | 1992 | 5,892  | 194 |     |       |
| 195 | 35646 | 2001 | 5,892  | 210 |     |       |
| 196 | 35656 | 1992 | 12,336 | 148 |     |       |
| 197 | 35656 | 1995 | 12,336 | 150 |     |       |
| 198 | 35661 | 1992 | 5,555  | 92  |     |       |
| 199 | 35661 | 2000 | 5,555  | 120 |     |       |
| 200 | 35666 | 1992 | 3,494  | 173 |     |       |
| 201 | 35666 | 2000 | 3,494  | 150 |     |       |
| 202 | 35903 | 1993 | 3,074  | 150 |     |       |
| 203 | 36475 | 2004 | 12,962 | 60  |     |       |
| 204 | 36475 | 2014 | 12,962 | 45  | 54  | 62.9  |
| 205 | 36478 | 2004 | 4,616  | 55  |     |       |
| 206 | 36478 | 2014 | 4,616  | 45  | 46  | 53.3  |
| 207 | 37221 | 2010 | 6,048  | 90  |     |       |
| 208 | 37224 | 2010 | 5,278  | 80  |     |       |
| 209 | 37226 | 2010 | 6,859  | 90  | 76  | 76.0  |
| 210 | 37228 | 2010 | 3,053  | 90  |     |       |
| 211 | 37607 | 1993 | 4,218  | 90  |     |       |
| 212 | 37700 | 1992 | 2,881  | 41  |     |       |
| 213 | 37722 | 2005 | 6,362  | 60  |     |       |
| 214 | 37765 | 2003 | 6,695  | 60  |     |       |
| 215 | 37766 | 2003 | 4,421  | 90  |     |       |
| 216 | 38100 | 1992 | 3,938  | 91  |     |       |
| 217 | 38100 | 2000 | 3,938  | 90  |     |       |
| 218 | 38100 | 2005 | 3,938  | 120 | 123 | 131.2 |
| 219 | 38120 | 1998 | 4,289  | 180 |     |       |
| 220 | 38724 | 1992 | 6,279  | 155 |     |       |

|     |       |      |        |     |       |       |
|-----|-------|------|--------|-----|-------|-------|
| 221 | 38724 | 1995 | 6,279  | 180 |       |       |
| 222 | 38724 | 2005 | 6,279  | 180 | 173   | 217.2 |
| 223 | 38745 | 1992 | 4,448  | 80  |       |       |
| 224 | 38745 | 2000 | 4,448  | 90  |       |       |
| 225 | 39400 | 1992 | 4,875  | 46  |       |       |
| 226 | 39400 | 2005 | 4,875  | 45  | 59.5  | 64.7  |
| 227 | 42145 | 1992 | 3,109  | 63  |       |       |
| 228 | 42145 | 1995 | 3,109  | 60  |       |       |
| 229 | 42145 | 2008 | 3,109  | 60  | 45    | 55.4  |
| 230 | 42145 | 2008 | 3,109  | 60  | 45    | 56.0  |
| 231 | 42415 | 1992 | 4,725  | 156 |       |       |
| 232 | 42415 | 2009 | 4,725  | 150 | 142   | 161.6 |
| 233 | 42415 | 2011 | 4,725  | 150 | 142   | 158.1 |
| 234 | 42821 | 1992 | 4,613  | 35  |       |       |
| 235 | 42826 | 1992 | 17,898 | 28  |       |       |
| 236 | 43117 | 1994 | 3,000  | 300 |       |       |
| 237 | 43117 | 2000 | 3,000  | 410 |       |       |
| 238 | 43279 | 2008 | 3,162  | 150 |       |       |
| 239 | 43280 | 1997 | 19,787 | 150 |       |       |
| 240 | 43281 | 2009 | 8,929  | 180 |       |       |
| 241 | 43282 | 2009 | 5,823  | 210 |       |       |
| 242 | 43632 | 1993 | 3,895  | 180 |       |       |
| 243 | 43632 | 2000 | 3,895  | 150 |       |       |
| 244 | 43632 | 2005 | 3,895  | 225 | 188   | 201.9 |
| 245 | 43633 | 1993 | 3,204  | 200 |       |       |
| 246 | 43633 | 2000 | 3,204  | 175 |       |       |
| 247 | 43633 | 2005 | 3,204  | 240 | 181   | 203.7 |
| 248 | 43644 | 2004 | 83,353 | 180 |       |       |
| 249 | 43645 | 2004 | 2,269  | 200 |       |       |
| 250 | 43770 | 2005 | 28,752 | 90  |       |       |
| 251 | 43774 | 2005 | 5,367  | 90  |       |       |
| 252 | 43775 | 2009 | 51,581 | 120 |       |       |
| 253 | 43820 | 1992 | 2,838  | 75  |       |       |
| 254 | 43820 | 2000 | 2,838  | 90  |       |       |
| 255 | 43820 | 2005 | 2,838  | 120 | 125.5 | 142.1 |
| 256 | 43840 | 1992 | 7,195  | 59  |       |       |
| 257 | 43840 | 2000 | 7,195  | 90  |       |       |
| 258 | 43840 | 2005 | 7,195  | 90  | 78    | 88.7  |
| 259 | 43846 | 1992 | 5,796  | 145 |       |       |
| 260 | 43846 | 1994 | 5,796  | 180 |       |       |
| 261 | 43846 | 2000 | 5,796  | 180 |       |       |
| 262 | 44005 | 1992 | 20,167 | 80  |       |       |
| 263 | 44005 | 2000 | 20,167 | 120 |       |       |



|     |       |      |        |      |       |       |
|-----|-------|------|--------|------|-------|-------|
| 264 | 44050 | 1992 | 3,668  | 66   |       |       |
| 265 | 44050 | 2000 | 3,668  | 82.5 |       |       |
| 266 | 44120 | 1992 | 37,707 | 95   |       |       |
| 267 | 44120 | 2000 | 37,707 | 90   |       |       |
| 268 | 44120 | 2005 | 37,707 | 134  | 119   | 147.7 |
| 269 | 44130 | 1992 | 2,757  | 90   |       |       |
| 270 | 44130 | 2000 | 2,757  | 120  |       |       |
| 271 | 44130 | 2005 | 2,757  | 131  | 112   | 128.6 |
| 272 | 44140 | 1992 | 53,037 | 104  |       |       |
| 273 | 44140 | 1995 | 53,037 | 150  |       |       |
| 274 | 44140 | 2005 | 53,037 | 150  | 133.5 | 151.0 |
| 275 | 44141 | 1992 | 7,976  | 142  |       |       |
| 276 | 44141 | 1995 | 7,976  | 180  |       |       |
| 277 | 44141 | 2006 | 7,976  | 160  | 135   | 158.5 |
| 278 | 44143 | 1992 | 21,001 | 118  |       |       |
| 279 | 44143 | 1995 | 21,001 | 180  |       |       |
| 280 | 44143 | 2005 | 21,001 | 150  | 137   | 152.1 |
| 281 | 44144 | 1992 | 6,672  | 136  |       |       |
| 282 | 44144 | 1995 | 6,672  | 180  |       |       |
| 283 | 44144 | 2006 | 6,672  | 165  | 145   | 162.8 |
| 284 | 44145 | 1992 | 23,581 | 155  |       |       |
| 285 | 44145 | 1995 | 23,581 | 210  |       |       |
| 286 | 44145 | 2006 | 23,581 | 180  | 159   | 177.5 |
| 287 | 44146 | 1992 | 4,971  | 173  |       |       |
| 288 | 44146 | 2006 | 4,971  | 240  | 188   | 201.8 |
| 289 | 44150 | 1992 | 9,225  | 157  |       |       |
| 290 | 44150 | 2005 | 9,225  | 180  | 173   | 190.9 |
| 291 | 44155 | 1992 | 3,112  | 223  |       |       |
| 292 | 44155 | 2005 | 3,112  | 240  | 223   | 257.4 |
| 293 | 44160 | 1992 | 30,304 | 156  |       |       |
| 294 | 44160 | 2000 | 30,304 | 120  |       |       |
| 295 | 44180 | 1992 | 13,807 | 120  |       |       |
| 296 | 44188 | 2005 | 4,168  | 90   |       |       |
| 297 | 44202 | 1997 | 4,527  | 200  |       |       |
| 298 | 44204 | 2001 | 57,893 | 180  |       |       |
| 299 | 44205 | 2001 | 27,063 | 165  |       |       |
| 300 | 44206 | 2002 | 2,855  | 180  |       |       |
| 301 | 44207 | 2002 | 30,862 | 195  |       |       |
| 302 | 44208 | 2002 | 2,524  | 205  |       |       |
| 303 | 44210 | 2002 | 4,872  | 240  |       |       |
| 304 | 44211 | 2002 | 2,455  | 300  |       |       |
| 305 | 44227 | 2005 | 3,000  | 150  |       |       |
| 306 | 44310 | 1992 | 2,697  | 59   |       |       |

|     |       |      |         |      |      |      |
|-----|-------|------|---------|------|------|------|
| 307 | 44310 | 2000 | 2,697   | 62.5 |      |      |
| 308 | 44320 | 1992 | 6,377   | 73   |      |      |
| 309 | 44320 | 2000 | 6,377   | 90   |      |      |
| 310 | 44346 | 1992 | 2,684   | 115  |      |      |
| 311 | 44346 | 2000 | 2,684   | 120  |      |      |
| 312 | 44602 | 1993 | 2,842   | 120  |      |      |
| 313 | 44602 | 2000 | 2,842   | 90   |      |      |
| 314 | 44602 | 2005 | 2,842   | 90   | 76   | 91.7 |
| 315 | 44620 | 1992 | 12,835  | 80   |      |      |
| 316 | 44620 | 2000 | 12,835  | 90   |      |      |
| 317 | 44625 | 1992 | 15,949  | 102  |      |      |
| 318 | 44625 | 2000 | 15,949  | 120  |      |      |
| 319 | 44626 | 1997 | 10,946  | 180  |      |      |
| 320 | 44626 | 2000 | 10,946  | 150  |      |      |
| 321 | 44950 | 1992 | 23,938  | 37   |      |      |
| 322 | 44950 | 1995 | 23,938  | 50   |      |      |
| 323 | 44950 | 2000 | 23,938  | 60   |      |      |
| 324 | 44960 | 1992 | 7,542   | 65   |      |      |
| 325 | 44960 | 2000 | 7,542   | 75   |      |      |
| 326 | 44970 | 1996 | 206,460 | 73   |      |      |
| 327 | 45110 | 1992 | 7,967   | 194  |      |      |
| 328 | 45110 | 2000 | 7,967   | 180  |      |      |
| 329 | 45111 | 1992 | 2,651   | 93   |      |      |
| 330 | 45130 | 1992 | 3,678   | 117  |      |      |
| 331 | 45130 | 2000 | 3,678   | 120  |      |      |
| 332 | 45170 | 1992 | 2,777   | 57   |      |      |
| 333 | 45395 | 2005 | 3,069   | 210  |      |      |
| 334 | 46040 | 1992 | 12,181  | 20   |      |      |
| 335 | 46040 | 2000 | 12,181  | 30   |      |      |
| 336 | 46040 | 2005 | 12,181  | 30   | 16   | 20.6 |
| 337 | 46060 | 1992 | 2,994   | 41   |      |      |
| 338 | 46060 | 2000 | 2,994   | 50   |      |      |
| 339 | 46060 | 2005 | 2,994   | 40   | 26.5 | 28.4 |
| 340 | 46947 | 2004 | 3,994   | 30   |      |      |
| 341 | 47120 | 1992 | 16,446  | 195  |      |      |
| 342 | 47120 | 2000 | 16,446  | 225  |      |      |
| 343 | 47122 | 1992 | 2,324   | 260  |      |      |
| 344 | 47122 | 2000 | 2,324   | 300  |      |      |
| 345 | 47125 | 1992 | 2,619   | 207  |      |      |
| 346 | 47125 | 2000 | 2,619   | 225  |      |      |
| 347 | 47130 | 1992 | 4,941   | 232  |      |      |
| 348 | 47130 | 2000 | 4,941   | 240  |      |      |
| 349 | 47562 | 2005 | 217,447 | 80   | 62   | 69.2 |

|     |       |      |         |      |      |       |
|-----|-------|------|---------|------|------|-------|
| 350 | 47563 | 2010 | 70,945  | 90   | 62.5 | 72.1  |
| 351 | 47600 | 1992 | 19,210  | 64   |      |       |
| 352 | 47600 | 2000 | 19,210  | 80   |      |       |
| 353 | 47600 | 2005 | 19,210  | 115  | 118  | 128.3 |
| 354 | 47600 | 2012 | 19,210  | 120  | 113  | 125.7 |
| 355 | 47605 | 1992 | 4,593   | 82   |      |       |
| 356 | 47605 | 2000 | 4,593   | 90   |      |       |
| 357 | 47605 | 2012 | 4,593   | 135  | 137  | 152.5 |
| 358 | 48140 | 1992 | 12,839  | 174  |      |       |
| 359 | 48140 | 2000 | 12,839  | 150  |      |       |
| 360 | 48150 | 1992 | 16,015  | 309  |      |       |
| 361 | 48150 | 1993 | 16,015  | 360  |      |       |
| 362 | 48150 | 2000 | 16,015  | 345  |      |       |
| 363 | 48153 | 1993 | 10,767  | 345  |      |       |
| 364 | 48153 | 2000 | 10,767  | 315  |      |       |
| 365 | 49000 | 1992 | 20,711  | 66   |      |       |
| 366 | 49000 | 1995 | 20,711  | 90   |      |       |
| 367 | 49000 | 2005 | 20,711  | 90   | 79   | 98.8  |
| 368 | 49002 | 1992 | 2,397   | 80   |      |       |
| 369 | 49002 | 2005 | 2,397   | 75   | 67   | 78.1  |
| 370 | 49020 | 1992 | 2,535   | 76   |      |       |
| 371 | 49020 | 1995 | 2,535   | 125  |      |       |
| 372 | 49020 | 2000 | 2,535   | 120  |      |       |
| 373 | 49203 | 2007 | 2,679   | 120  |      |       |
| 374 | 49205 | 2007 | 3,079   | 225  |      |       |
| 375 | 49321 | 1993 | 6,189   | 60   |      |       |
| 376 | 49321 | 1996 | 6,189   | 45   |      |       |
| 377 | 49322 | 1997 | 2,257   | 45   |      |       |
| 378 | 49324 | 2006 | 6,297   | 60   |      |       |
| 379 | 49422 | 1994 | 2,864   | 48   |      |       |
| 380 | 49505 | 1992 | 117,986 | 48   |      |       |
| 381 | 49505 | 1993 | 117,986 | 60   |      |       |
| 382 | 49505 | 2000 | 117,986 | 60   |      |       |
| 383 | 49505 | 2005 | 117,986 | 70   | 60   | 64.2  |
| 384 | 49507 | 1993 | 14,439  | 98   |      |       |
| 385 | 49507 | 2000 | 14,439  | 67.5 |      |       |
| 386 | 49507 | 2009 | 14,439  | 70   | 67   | 74.9  |
| 387 | 49507 | 2011 | 14,439  | 70   | 67   | 76.4  |
| 388 | 49520 | 1992 | 11,814  | 78   |      |       |
| 389 | 49520 | 1993 | 11,814  | 90   |      |       |
| 390 | 49520 | 2000 | 11,814  | 60   |      |       |
| 391 | 49521 | 1993 | 2,951   | 120  |      |       |
| 392 | 49521 | 2000 | 2,951   | 90   |      |       |

|     |       |      |        |     |    |      |
|-----|-------|------|--------|-----|----|------|
| 393 | 49521 | 2009 | 2,951  | 90  | 72 | 80.7 |
| 394 | 49521 | 2011 | 2,951  | 90  | 65 | 76.5 |
| 395 | 49525 | 1992 | 3,107  | 78  |    |      |
| 396 | 49525 | 1993 | 3,107  | 90  |    |      |
| 397 | 49525 | 2000 | 3,107  | 60  |    |      |
| 398 | 49550 | 1992 | 2,325  | 64  |    |      |
| 399 | 49550 | 1993 | 2,325  | 75  |    |      |
| 400 | 49550 | 2000 | 2,325  | 60  |    |      |
| 401 | 49553 | 1993 | 3,023  | 108 |    |      |
| 402 | 49553 | 2000 | 3,023  | 75  |    |      |
| 403 | 49560 | 1992 | 71,234 | 73  |    |      |
| 404 | 49560 | 1993 | 71,234 | 90  |    |      |
| 405 | 49560 | 2000 | 71,234 | 90  |    |      |
| 406 | 49561 | 1993 | 30,322 | 120 |    |      |
| 407 | 49561 | 2000 | 30,322 | 100 |    |      |
| 408 | 49565 | 1992 | 20,397 | 96  |    |      |
| 409 | 49565 | 1993 | 20,397 | 90  |    |      |
| 410 | 49565 | 2000 | 20,397 | 100 |    |      |
| 411 | 49566 | 1993 | 9,695  | 120 |    |      |
| 412 | 49566 | 2000 | 9,695  | 120 |    |      |
| 413 | 49570 | 1992 | 5,473  | 39  |    |      |
| 414 | 49570 | 1993 | 5,473  | 60  |    |      |
| 415 | 49570 | 2000 | 5,473  | 60  |    |      |
| 416 | 49572 | 1993 | 3,361  | 60  |    |      |
| 417 | 49572 | 2000 | 3,361  | 60  |    |      |
| 418 | 49585 | 1993 | 67,765 | 60  |    |      |
| 419 | 49585 | 2000 | 67,765 | 45  |    |      |
| 420 | 49587 | 1993 | 31,001 | 75  |    |      |
| 421 | 49587 | 2000 | 31,001 | 60  |    |      |
| 422 | 49587 | 2009 | 31,001 | 60  | 38 | 45.5 |
| 423 | 49587 | 2011 | 31,001 | 60  | 39 | 46.6 |
| 424 | 49650 | 1993 | 47,390 | 60  |    |      |
| 425 | 49651 | 1993 | 6,403  | 90  |    |      |
| 426 | 49652 | 2007 | 21,131 | 90  |    |      |
| 427 | 49652 | 2011 | 21,131 | 90  | 66 | 79.7 |
| 428 | 49653 | 2007 | 10,694 | 120 |    |      |
| 429 | 49653 | 2011 | 10,694 | 120 | 61 | 75.2 |
| 430 | 49654 | 2007 | 16,391 | 120 |    |      |
| 431 | 49654 | 2011 | 16,391 | 120 | 87 | 99.4 |
| 432 | 49655 | 2007 | 6,908  | 150 |    |      |
| 433 | 49655 | 2011 | 6,908  | 150 | 86 | 96.8 |
| 434 | 49656 | 2007 | 4,423  | 120 |    |      |
| 435 | 49657 | 2007 | 2,503  | 180 |    |      |

|     |       |      |        |     |     |       |
|-----|-------|------|--------|-----|-----|-------|
| 436 | 50220 | 1992 | 3,141  | 126 |     |       |
| 437 | 50220 | 1995 | 3,141  | 120 |     |       |
| 438 | 50230 | 1992 | 3,777  | 222 |     |       |
| 439 | 50230 | 1992 | 3,777  | 222 |     |       |
| 440 | 50240 | 1992 | 5,041  | 158 |     |       |
| 441 | 50240 | 1995 | 5,041  | 180 |     |       |
| 442 | 50543 | 2002 | 9,273  | 240 |     |       |
| 443 | 50545 | 2000 | 6,443  | 240 |     |       |
| 444 | 50546 | 1999 | 5,037  | 205 |     |       |
| 445 | 50548 | 1999 | 2,246  | 270 |     |       |
| 446 | 51595 | 1992 | 4,162  | 328 |     |       |
| 447 | 52234 | 1992 | 11,868 | 35  |     |       |
| 448 | 52234 | 2011 | 11,868 | 30  | 19  | 25.1  |
| 449 | 52235 | 1992 | 9,731  | 37  |     |       |
| 450 | 52235 | 2011 | 9,731  | 45  | 27  | 32.5  |
| 451 | 52240 | 1992 | 6,117  | 71  |     |       |
| 452 | 52240 | 2011 | 6,117  | 60  | 40  | 47.7  |
| 453 | 52601 | 1992 | 22,625 | 62  |     |       |
| 454 | 52601 | 2005 | 22,625 | 75  |     |       |
| 455 | 52630 | 1992 | 2,612  | 48  |     |       |
| 456 | 52630 | 2010 | 2,612  | 60  | 46  | 52.8  |
| 457 | 52648 | 1994 | 11,875 | 60  |     |       |
| 458 | 55040 | 1992 | 4,407  | 50  |     |       |
| 459 | 55845 | 1992 | 3,845  | 247 |     |       |
| 460 | 55845 | 2014 | 3,845  | 198 | 170 | 182.3 |
| 461 | 55866 | 2002 | 31,189 | 310 |     |       |
| 462 | 55866 | 2009 | 31,189 | 210 | 195 | 207.9 |
| 463 | 55866 | 2015 | 31,189 | 180 | 195 | 205.8 |
| 464 | 57240 | 1992 | 3,452  | 45  |     |       |
| 465 | 57240 | 2005 | 3,452  | 60  |     |       |
| 466 | 57250 | 1992 | 3,261  | 37  |     |       |
| 467 | 57250 | 2005 | 3,261  | 60  |     |       |
| 468 | 57260 | 1992 | 4,423  | 61  |     |       |
| 469 | 57260 | 2005 | 4,423  | 90  |     |       |
| 470 | 57265 | 1992 | 2,607  | 71  |     |       |
| 471 | 57265 | 2005 | 2,607  | 120 | 83  | 83.0  |
| 472 | 57288 | 1992 | 21,176 | 64  |     |       |
| 473 | 57288 | 2005 | 21,176 | 60  |     |       |
| 474 | 57288 | 2008 | 21,176 | 60  | 43  | 58.6  |
| 475 | 57288 | 2010 | 21,176 | 60  | 35  | 54.0  |
| 476 | 57425 | 2003 | 2,396  | 120 |     |       |
| 477 | 58140 | 1992 | 3,399  | 73  |     |       |
| 478 | 58140 | 1995 | 3,399  | 120 |     |       |

|     |       |      |        |       |      |       |
|-----|-------|------|--------|-------|------|-------|
| 479 | 58146 | 2002 | 2,672  | 150   |      |       |
| 480 | 58150 | 1992 | 41,532 | 89    |      |       |
| 481 | 58150 | 1995 | 41,532 | 120   |      |       |
| 482 | 58150 | 2005 | 41,532 | 120   | 84.5 | 165.2 |
| 483 | 58180 | 1992 | 6,616  | 71    |      |       |
| 484 | 58180 | 1995 | 6,616  | 130   |      |       |
| 485 | 58210 | 1992 | 3,077  | 192   |      |       |
| 486 | 58210 | 1995 | 3,077  | 240   |      |       |
| 487 | 58260 | 1992 | 16,584 | 70    |      |       |
| 488 | 58260 | 2000 | 16,584 | 60    |      |       |
| 489 | 58260 | 2002 | 16,584 | 60    |      |       |
| 490 | 58262 | 2002 | 7,903  | 91    |      |       |
| 491 | 58541 | 2006 | 4,303  | 95    |      |       |
| 492 | 58541 | 2014 | 4,303  | 75    | 125  | 148.6 |
| 493 | 58542 | 2006 | 5,849  | 110   |      |       |
| 494 | 58542 | 2014 | 5,849  | 88    | 154  | 169.0 |
| 495 | 58545 | 2003 | 3,007  | 120   |      |       |
| 496 | 58548 | 2006 | 3,739  | 240   |      |       |
| 497 | 58550 | 2003 | 7,163  | 100   |      |       |
| 498 | 58552 | 2003 | 17,806 | 120   |      |       |
| 499 | 58554 | 2003 | 2,513  | 167.5 |      |       |
| 500 | 58570 | 2007 | 7,582  | 120   |      |       |
| 501 | 58570 | 2014 | 7,582  | 90    | 119  | 132.2 |
| 502 | 58571 | 2007 | 37,194 | 135   |      |       |
| 503 | 58571 | 2014 | 37,194 | 90    | 124  | 137.0 |
| 504 | 58573 | 2007 | 7,074  | 165   |      |       |
| 505 | 58573 | 2014 | 7,074  | 130   | 155  | 168.1 |
| 506 | 58720 | 1992 | 4,510  | 52    |      |       |
| 507 | 58720 | 1995 | 4,510  | 120   |      |       |
| 508 | 58720 | 2005 | 4,510  | 90    | 91.5 | 102.5 |
| 509 | 59151 | 1992 | 4,171  | 75    |      |       |
| 510 | 59151 | 1997 | 4,171  | 80    |      |       |
| 511 | 60210 | 1994 | 6,292  | 105   |      |       |
| 512 | 60220 | 1992 | 31,047 | 97    |      |       |
| 513 | 60220 | 2000 | 31,047 | 90    |      |       |
| 514 | 60220 | 2010 | 31,047 | 90    | 82   | 90.9  |
| 515 | 60225 | 1992 | 2,548  | 122   |      |       |
| 516 | 60240 | 1992 | 49,652 | 159   |      |       |
| 517 | 60240 | 2010 | 49,652 | 150   | 111  | 122.3 |
| 518 | 60252 | 1992 | 10,042 | 209   |      |       |
| 519 | 60252 | 2000 | 10,042 | 180   |      |       |
| 520 | 60260 | 1992 | 4,442  | 159   |      |       |
| 521 | 60260 | 2000 | 4,442  | 145   |      |       |

|     |       |      |        |     |     |       |
|-----|-------|------|--------|-----|-----|-------|
| 522 | 60271 | 2000 | 3,493  | 150 |     |       |
| 523 | 60500 | 1992 | 38,597 | 138 |     |       |
| 524 | 60500 | 2010 | 38,597 | 120 | 79  | 91.4  |
| 525 | 60650 | 1998 | 5,960  | 180 |     |       |
| 526 | 61312 | 1992 | 2,377  | 150 |     |       |
| 527 | 61312 | 1995 | 2,377  | 120 |     |       |
| 528 | 61312 | 2005 | 2,377  | 150 |     |       |
| 529 | 61510 | 1992 | 13,771 | 219 |     |       |
| 530 | 61510 | 1995 | 13,771 | 200 |     |       |
| 531 | 61512 | 1992 | 4,568  | 241 |     |       |
| 532 | 61512 | 1995 | 4,568  | 240 |     |       |
| 533 | 61518 | 1992 | 2,236  | 299 |     |       |
| 534 | 61518 | 1995 | 2,236  | 240 |     |       |
| 535 | 63005 | 1992 | 3,006  | 142 |     |       |
| 536 | 63005 | 1995 | 3,006  | 143 |     |       |
| 537 | 63020 | 1992 | 2,435  | 129 |     |       |
| 538 | 63020 | 1995 | 2,435  | 120 |     |       |
| 539 | 63030 | 1992 | 38,682 | 91  |     |       |
| 540 | 63030 | 1995 | 38,682 | 90  |     |       |
| 541 | 63042 | 1992 | 5,615  | 159 |     |       |
| 542 | 63042 | 1995 | 5,615  | 120 |     |       |
| 543 | 63045 | 1992 | 3,242  | 137 |     |       |
| 544 | 63045 | 2014 | 3,242  | 120 | 117 | 139.6 |
| 545 | 63047 | 1992 | 28,976 | 121 |     |       |
| 546 | 63047 | 1995 | 28,976 | 120 |     |       |
| 547 | 63047 | 2005 | 28,976 | 90  |     |       |
| 548 | 63047 | 2013 | 28,976 | 90  | 113 | 134.7 |
| 549 | 63075 | 1992 | 4,764  | 138 |     |       |
| 550 | 63075 | 1995 | 4,764  | 120 |     |       |
| 551 | 63075 | 2005 | 4,764  | 90  |     |       |
| 552 | 63081 | 1992 | 3,559  | 175 |     |       |
| 553 | 69631 | 1992 | 3,850  | 104 |     |       |

---

## REFERENCES

1. American Medical Association. Medicare RBRVS 2018: The physicians' guide. Chicago: American Medical Association, 2018.
2. American Medical Association, RVS Update Committee (RUC). <https://www.ama-assn.org/rvs-update-committee-ruc> (Accessed Feb 16 2018)
3. American Medical Association. RVS update process 2018. [https://www.ama-assn.org/sites/default/files/media-browser/public/rbrvs/ruc-update-booklet\\_0.pdf](https://www.ama-assn.org/sites/default/files/media-browser/public/rbrvs/ruc-update-booklet_0.pdf) (Accessed Feb 12 2018).
4. Laugesen MJ. Fixing medical prices: how physicians are paid. Cambridge, MA: Harvard University Press, 2016.
5. Hsiao WC, Braun P, Becker ER, et al. A national study of resource-based relative value scales for physician services: Phase I. Final Report. (HCFA Cont. No. 17-C-98795/1-03). Boston: Harvard School of Public Health, 1988.
